# Supplementary material for: Characterization of Influenza A (H7N9) Viruses Isolated from Human Cases Imported into Taiwan
Source: PubMed Central journal article supplement (PMC4351886; doi:10.1371/journal.pone.0119792), 2015-03-06
Supplement: pone.0119792.s001.pdf [file pone.0119792.s001.pdf]

**Table S1. The nucleotide identity of the four imported influenza A(H7N9) and selected representative isolates, compared to the full-length sequences of A/Anhui/1/2013 virus.**

| Viruses                      | Gene segments |       |       |       |       |       |       |       |
|------------------------------|---------------|-------|-------|-------|-------|-------|-------|-------|
|                              | PB2           | PB1   | PA    | HA    | NP    | NA    | MP    | NS    |
| A/Taiwan/1/2013              | 0.999         | 0.998 | 0.998 | 0.997 | 1     | 0.998 | 0.978 | 1     |
| A/Taiwan/3/2013              | 0.966         | 0.996 | 0.997 | 0.996 | 0.996 | 0.994 | 0.976 | 0.995 |
| A/Taiwan/1/2014              | 0.965         | 0.994 | 0.975 | 0.994 | 0.995 | 0.992 | 0.977 | 0.997 |
| A/Taiwan/2/2014              | 0.962         | 0.994 | 0.993 | 0.994 | 0.993 | 0.993 | 0.976 | 0.998 |
| A/Shanghai/01/2014           | 0.965         | 0.998 | 0.997 | 0.996 | 0.998 | 0.996 | 0.977 | 0.996 |
| A/chicken/Jiangsu/SC537/2013 | 0.969         | 0.999 | 0.999 | 0.998 | 1     | 0.997 | 0.981 | 1     |
| A/Guangdong/1/2013           | 0.963         | 0.971 | 0.996 | 0.997 | 0.965 | 0.999 | 1     | 0.967 |
| A/Guangdong/05/2013          | 0.959         | 0.97  | 0.962 | 0.997 | 0.962 | 0.995 | 0.998 | 0.963 |
| A/Hong Kong/734/2014         | 0.96          | 0.969 | 0.996 | 0.992 | 0.963 | 0.997 | 0.996 | 0.965 |
| A/Hong Kong/3263/2014        | 0.96          | 0.97  | 0.964 | 0.994 | 0.961 | 0.994 | 0.996 | 0.964 |
